# Supplementary material
Source: PubMed Central journal article supplement (PMC5568669)
Supplement: NIHMS889798-supplement-Supplement1.pdf [file NIHMS889798-supplement-Supplement1.pdf]

## Supplementary Appendix

This appendix has been provided by the authors to give readers additional information about their work.

Supplement to: Cahill KN, Katz HR, Cui J, et al. KIT inhibition by imatinib in patients with severe refractory asthma. *N Engl J Med* 2017;376:1911-20. DOI: [10.1056/NEJMoa1613125](https://doi.org/10.1056/NEJMoa1613125)

**Supplemental Appendix:****Table of Contents:**

|                         |    |
|-------------------------|----|
| Supplemental Methods    | 2  |
| Supplemental Figures    | 10 |
| Supplemental Tables     | 12 |
| Supplemental References | 16 |

## Supplementary Methods:

### Methacholine challenge

All asthma medications that could be safely withheld the morning of methacholine challenge were withheld e.g. oral glucocorticoids, leukotriene receptor antagonists (LTRAs), etc. Timing of medications that the patient could not withhold was noted so that the timing was reproduced each time the challenge was administered. Methacholine challenge has been performed safely in asthmatics with baseline FEV<sub>1</sub> as low as 55% (1). For the purposes of the KIA trial, the lower FEV<sub>1</sub>% limit was set at 40%. Appropriate safety features were in place throughout the methacholine challenges including the presence of a study qualified medical personnel, immediate availability of emergency rescue medication, and reversal with inhaled bronchodilator at the completion of the challenge to within 10% of their pre-challenge FEV<sub>1</sub>%. One severe adverse event that was attributed to methacholine challenge was reported in a patient with frequent glucocorticoid-requiring exacerbations maintained on oral glucocorticoids. A full methacholine challenge including reversal of FEV<sub>1</sub> to within 90% of baseline was performed. One hour later the patient reported congestion and mucus. She increased her oral glucocorticoids that evening and 2 days later was admitted to the ICU for 2 days of treatment and was eventually discharged.

PC<sub>20</sub> was determined using standard techniques (2, 3) up to a methacholine concentration of 25 mg/ml. Participants withheld their morning dose ( $\geq 12$  hour withhold) of inhaled glucocorticoids and long-acting bronchodilators and their short-acting beta-agonist dose for  $\geq 6$  hours. For those patients who failed to react at 25 mg/ml we had predetermined that we would extrapolate the value and truncate extrapolation at 100 mg/ml (1 imatinib extrapolated to 58 and 3 imatinib and 3 placebo truncated at 100). Bronchoscopy with endobronchial biopsy was performed as outlined in the supplement (Supplemental Appendix).

### Allergy Skin Testing

Testing was performed after participants withheld their antihistamine for 1 to 7 days depending on the class. 10 allergen extracts (mite mix, cockroach, mouse, rat, penicillium mix, *alternaria alternata*, aspergillus mix, cat and dog at 1:20 w/v, and *cladosporium herbarum* at 1:40 w/v) from Greer Laboratories, Lenoir, NC plus positive histamine 10mg/ml and negative 50% glycerin controls were assessed at baseline, week 12 and week 17. The test was read at 15 minutes and largest wheal diameter and corresponding perpendicular diameter was measured in mm and mean diameter calculated. Participants with dermatographism, i.e. mean diameter of negative control  $\geq 3$ mm, or FEV<sub>1</sub> below 50% predicted were excluded from testing.

## **Maximum Bronchodilator Response Testing**

Asthma medications were withheld and participants performed 3 spirometry maneuvers 15 minutes after 2 puffs of albuterol were delivered via meter dose inhaler (MDI). The percent change in FEV<sub>1</sub> was calculated after each administration of albuterol to determine an albuterol dose response curve for each participant. This process was repeated up to a maximum of 8 puffs of albuterol or until the change in FEV<sub>1</sub> from baseline or prior post-bronchodilator value was ≤ 5%.

## **Peak Expiratory Flow (PEF)**

PEF measurements were electronically recorded and date/time stamped from the AM1 device (Jaeger, Germany) (4). Participants are instructed to perform their morning and evening peak flow maneuvers right before taking their study medications.

## **Mast Cell Mediators**

All urine samples were stored at -80°C and analyzed by using gas chromatography–mass spectrometry. The stable cysteinyl leukotriene metabolite LTE<sub>4</sub> (5) and the major PGD<sub>2</sub> metabolite 9a,11b-dihydroxy-15-oxo-2,3,18,19-tetranorprost-5-ene-1,20-dioic acid (PGD-M) (6) were measured and reported as picomoles per milligram of creatinine (Cr) in urine. Serum and BAL total tryptase levels were measured by UniCAP and ELISA respectively at Virginia Commonwealth University (7, 8). The stable cysteinyl leukotriene metabolite LTE<sub>4</sub> (5) and the major PGD<sub>2</sub> metabolite (PGD-M) (6) were measured and reported as picomoles per milligram of creatinine (Cr) in urine. BAL fluid was assessed for PGD<sub>2</sub>, histamine, and cys-LTs (PGD2-MOX ELISA, histamine EIA, and cysetinyl leukotriene ELISA, Cayman Chemical, Ann Arbor, MI) according to the manufacturer's instructions after C18 column lipid purification (GE Healthcare, Pittsburgh, PA) as described previously (9).

## **Immunohistologic counting of MCs**

Biopsies were fixed in 4% paraformaldehyde, embedded in paraffin, and 6 μm sections were prepared. Sections were incubated with 3% hydrogen peroxide to inactive endogenous peroxidases, Dako Target Retrieval Solution pH 9, and mouse anti-human tryptase mAb AA1 (Dako) at a concentration of 0.1 μg/ml or isotype control mouse IgG1 at the same concentration. Antibody binding was visualized with the DAKO EnVision+ System-HRP (AEC) system, and sections were counterstained with Gill's hematoxylin number 2 (Sigma). Sections incubated with the isotype control were negative for MC staining.

One blinded observer (HRK) counted the number and distribution of mast cells in endobronchial biopsies, measuring the numbers of mast cells in the ASM and total airway per millimeter (mm)<sup>2</sup> using immunoreactivity for tryptase in 6 μm paraffin sections(10, 11). For each patient visit, we analyzed a minimum total smooth muscle area of 0.1 mm<sup>2</sup> from at least two

sections, either from different biopsy fragments or at least 10  $\mu\text{m}$  apart if from the same biopsy fragment. The coefficient of variation in mast cell counts was less than or equal to 5.5%.

For MC counts in muscle, muscle regions were delineated in photomicrographs and their areas were determined with Image J software, muscle MCs were counted on the photomicrographs with Image J, and the number of MCs was divided by the area of muscle analyzed. A single blinded investigator performed all mast cell enumerations. 10 randomly selected biopsies were recounted in a blinded fashion to assess for the coefficient of variation.

Total MC counts were done on the same biopsy specimens used for muscle MC counts. The total areas of the biopsies were determined in photomicrographs with Image J, MCs in the regions not already counted in the muscle analyses were counted, and the combined MCs counts were divided by the total areas of the biopsies.

### **Bronchial alveolar lavage cell counts**

Cytospin slides of BAL cells were prepared and stained with Dif-Quick. Up to 200 cells per sample were analyzed.

### **Statistical analysis**

Our primary outcome was change in airway hyperresponsiveness, as assessed by  $\text{PC}_{20}$ , from baseline to 3 and/or 6 months of therapy in imatinib treated participants as compared with controls. Change in  $\text{PC}_{20}$  was assessed using  $\log_2$ -transformed ratios of  $\text{PC}_{20}$  at month 3 and/or month 6 vs  $\text{PC}_{20}$  at baseline. Our null hypothesis was that the mean of this ratio will be 0 after  $\log_2$ -transformed. We used a linear mixed-effects model for a repeated-measures analysis to compare the primary outcome between the two groups. The statistical model was

$$Y_{ijk} = \mu_{ik} + \varepsilon_{ijk}$$

where  $Y_{ijk}$  is the response from the  $k^{\text{th}}$  study visit of the  $j^{\text{th}}$  participant within the  $i^{\text{th}}$  treatment group,  $\mu_{ik}$  is the population mean for the  $k^{\text{th}}$  study visit within the  $i^{\text{th}}$  treatment group, and  $\varepsilon_{ijk}$  is the random error term, in which  $[\varepsilon_{ij1} \ \varepsilon_{ij2} \ \dots \ \varepsilon_{ijK}]^T$  follows a K-variate normal distribution with null mean vector and unstructured variance-covariance matrix  $\Sigma$ .

The primary analysis was performed for a modified per-protocol population, which included all randomly assigned participants for whom there was at least one post-baseline observation. Those without a post-randomization  $\text{PC}_{20}$  were not included. Our observed beta estimate for treatment was 1.29 (SE 0.64), p value = 0.0485. The treatment group on average had a 3.6-fold higher  $\text{PC}_{20}$  change relative to baseline, which represents a statistically significant change compared to the control group.

For FEV<sub>1</sub> we used a linear mixed-effects model to assess the between-group difference in the change from baseline over weeks 8-24. Any Participant that did not have at least one value reported after week 8 was not included in the analysis.

## **Bronchoscopy**

### Exclusion Criteria for Bronchoscopy Procedure

The participant will not be eligible for the bronchoscopy procedure, if he/she meets any of the following criteria.

1. Participant's pre-bronchodilator FEV<sub>1</sub> is < 40% predicted or < 85% of their study baseline
2. Participant has been hospitalized for asthma within the past 6 weeks
3. Participant required intubation for asthma within the past 6 months
4. Participant experienced > 12 asthma exacerbations within the past year
5. Participant needed to use > 16 puffs SABA per day in the past 48 hours
6. Participant experienced increased asthma symptoms requiring SABA use >8 puffs/day over baseline in the past 48 hours
7. Participant required an additional oral corticosteroid (OCS) or a doubling of OCS dose in the past 14 days
8. When required, the participant cannot arrange a caretaker to drive them home
9. Participants having URI in the past 14 days will require MD approval

## **Bronchoscopy Procedures**

### I. Biopsies

Biopsies should be performed first, followed by the brushings, and finally BAL at the end. Please see the flow diagram that follows. Before proceeding with biopsies, check forceps for proper function. The technician or nurse should be prepared to assist the physician in obtaining biopsies (if so requested). The instillations should be performed as per the following flow diagram. BAL is performed by instilling warmed (37<sup>0</sup>C) sterile saline and collecting the fluid recovered into fresh 50 mL polypropylene tubes. During the BAL procedure, no air is introduced behind the lavage sample. BAL fluid is pooled into 1 or 2 50 mL polypropylene tubes based on the amount of sample. Return specimen tubes may need to be switched when full, and are collected on ice. If participant has difficulty with coughing, do not proceed to the bronchial wash.

When biopsies are taken, pull gently and consistently for best results. Do not pull quickly or jerk at the forceps. During collection, place each biopsy sample in the specific tubes until you obtain 8-10 acceptable samples. The samples should be put in the tubes according to their order of collection, i.e. the first acceptable sample collected is placed in the tube #1 and so on. The preferred order for samples is listed in the KIA Specimen MOP. Make sure that the location of each sample is known.

- a. Evaluate the biopsy for acceptability according to criteria. Adequate biopsy specimen characteristics:
  - i. One piece (not several small pieces).
  - ii. Big as a pinhead (1-2 mm).
  - iii. White, not red (i.e. little blood as possible, although later biopsy pieces will likely to have more blood than the earlier ones).
  - iv. Non-cartilaginous. A biopsy with cartilage is usually bigger and less elastic than the one without cartilage.
  - v. Pieces should sink (*NOT float*) to the bottom of the collection tubes.
  - vi. **If you feel the specimen is not adequate, place it in the appropriate solution, but inform the physician that he/she needs to obtain another sample.**
- b. If acceptable, write a "1" on the top of the tube of the first acceptable sample collected in permanent marker, record the location from where it was taken and place on ice.
- c. If unacceptable, write an "X1" on the top of tube, record the collection site and place on ice.
- d. Subsequent acceptable biopsies should be marked "2", "3", "4", "5", "6", "7" and "8" sequentially and unacceptable biopsies "X2", "X3" and so on as they are taken.

Ten acceptable biopsy specimens are needed. Once the biopsy specimen is taken, the forceps should be given to the individual handling tissue. Consult Specimen Technician for quality.

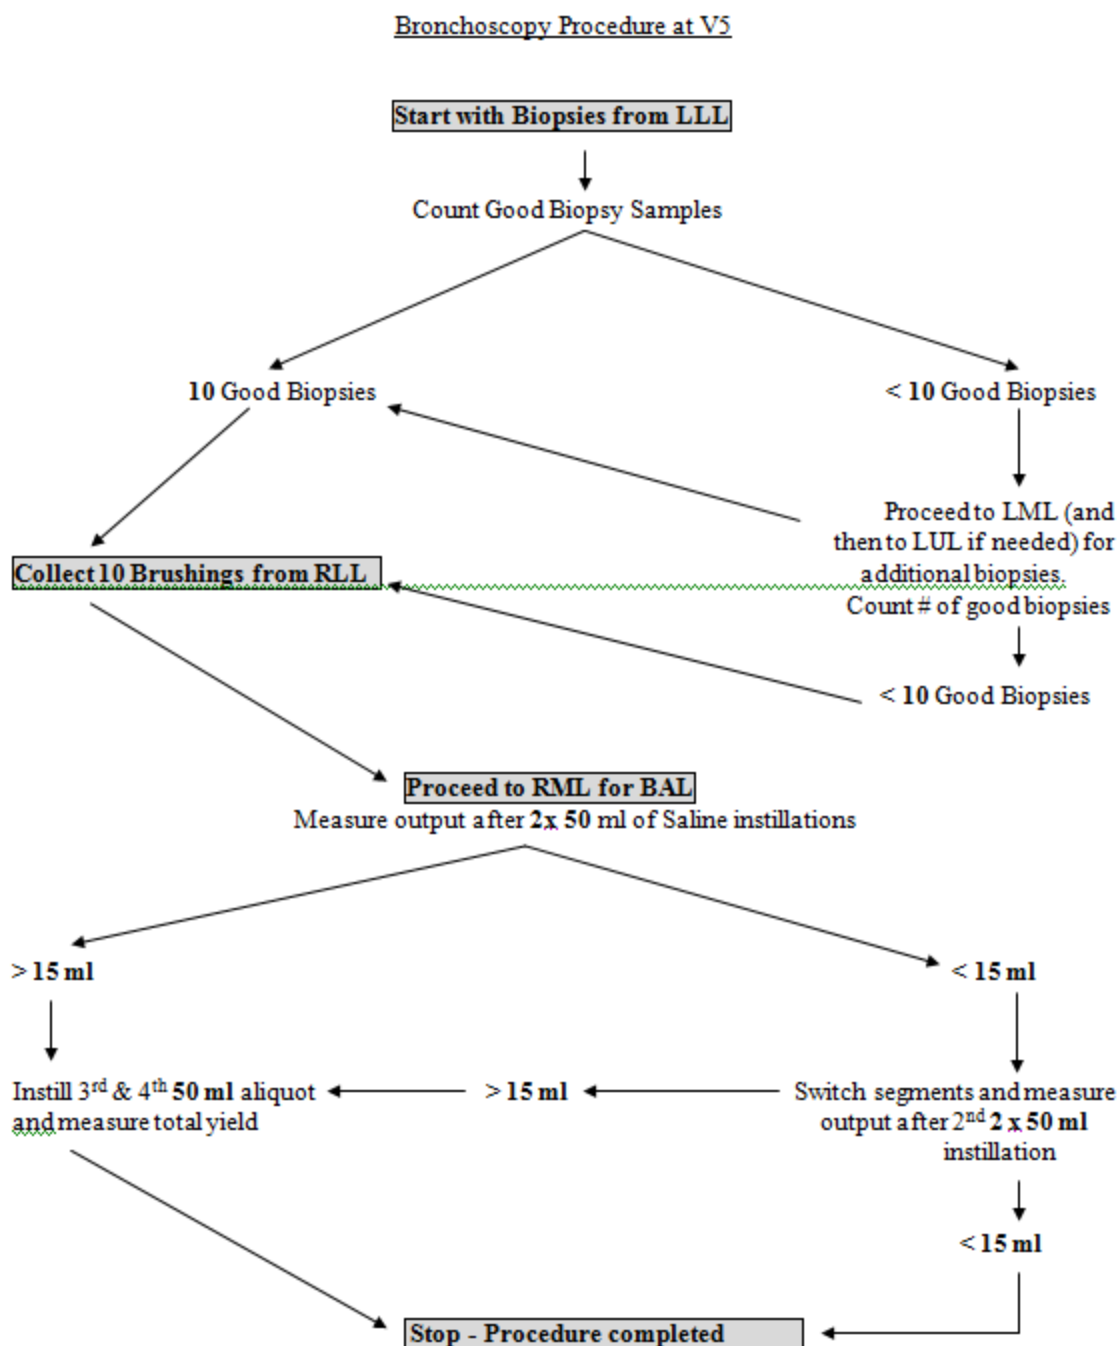

**Note:** During second bronchoscopy procedure, the sequences of procedures will remain the same, except we will switch the procedures performed on the left lung with the right lung. See following diagram.



Bronchoscopy Procedure at V18

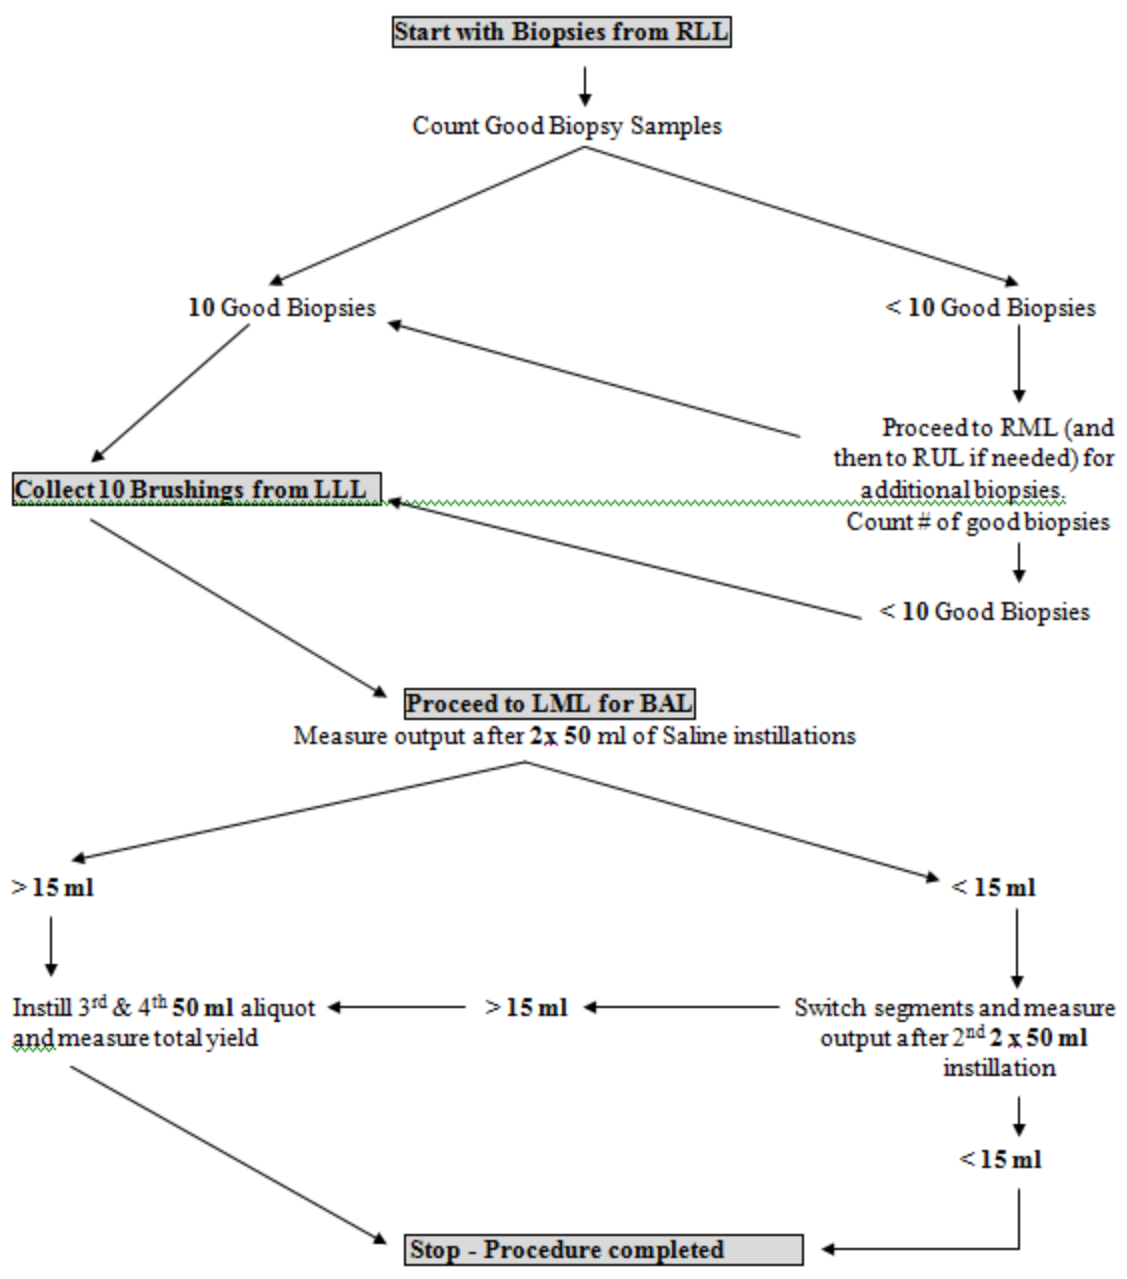

## II. Brushings

Brushings should be taken after biopsies. Bronchial brushings should be performed from segments of the lung where you did not perform bronchial biopsy. Advance the BARD Disposable

Microbiology Brush into the segment and “drop” the plug. Advance the brush and gently brush the bronchial mucosa (about 0.5 to 1 inch) while rotating the brush 360°. After about 10 seconds of brushing, retract the brush completely into the inner catheter. Then retract the inner catheter into the outer catheter by pulling the blue and white section apart. Withdraw the microbiology brush assembly from the bronchoscope. See description below on how to remove the brush. Collect additional microbiology brush samples.

Remove the brush sample by first wiping the outer catheter approximately 5 mm distal to the inner catheter with an alcohol prep (proposed cut site), and then cut the outer catheter at the alcohol cleansed site, and discard. Then, completely advance the inner catheter. Wipe the inner catheter about 5 mm distal to the brush tip (proposed cut site) with another alcohol prep, and then cut the inner catheter at the alcohol cleansed site. Advance the brush directly and completely into the 2.0 mL microtube containing RNALater™. Cut the wire level with the top of the tube, so that brush is kept fully immersed in the RNALater™. Screw the cap on tightly and place on ice. Be sure that the forceps do not contact the RNALater™.

## III. BAL

BAL will employ 50 ml aliquots. The standard technique will be instillation and recovery of one aliquot, followed by instillation and recovery of second aliquot. If the recovered volume is < 15 ml from the first two 50 ml injectates, then switch to another segment. If the recovered volume from the second segment is again < 15 ml after two 50 ml instillations, then BAL will be stopped. If the recovered volume from initial or second segment after two instillations is > 15 ml then instill the 3<sup>rd</sup> and 4<sup>th</sup> aliquot of 50 ml saline and measure the total return. The BAL procedure should be stopped after the 4<sup>th</sup> instillation. The BAL return after all instillations will be pooled and measured. The total volume of BAL should be combined and quickly mixed to ensure consistency in the samples.

During second bronchoscopy procedure, the sequences of procedures as described above will remain the same, except we will switch the procedures performed in the right lung with the left lung and vice versa.

**Supplemental Figures:****Supplemental Figure S1: Modeled Effect of Imatinib and Placebo on FEV<sub>1</sub> Over 24 Weeks.**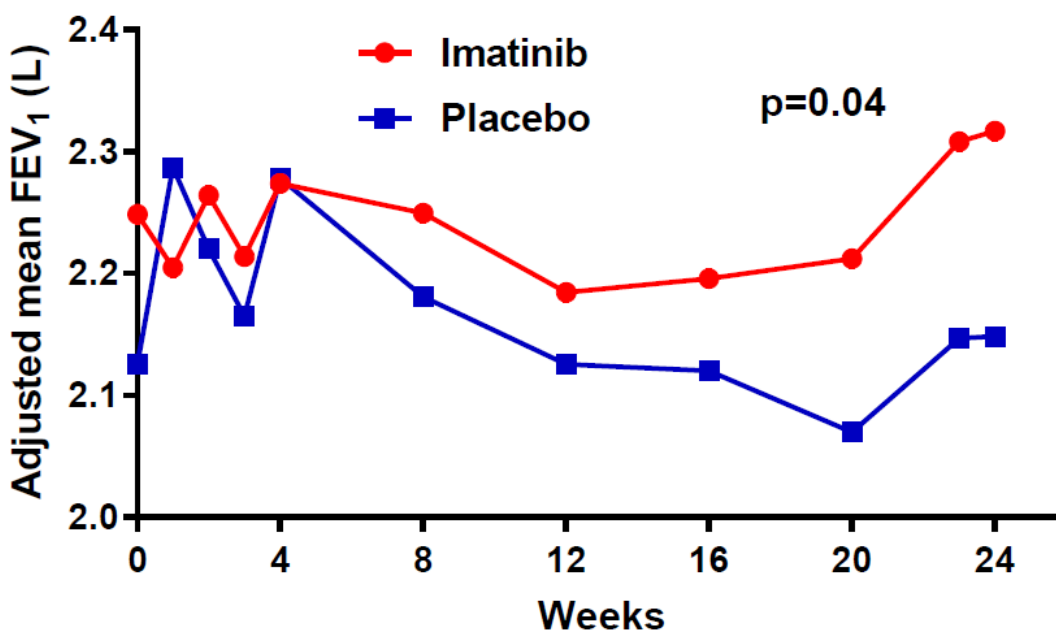**Supplemental Figure 1. Modeled Effect of Imatinib and Placebo on FEV<sub>1</sub> Over 24 Weeks.**

Shown are the modeled group mean FEV<sub>1</sub> at baseline, weeks 1, 2, 3, 4, 8, 12, 16, 20, 23, and 24. The p-value is 0.04 for the between-group difference in the change from baseline as assessed by the mixed model.

**Supplemental Figure S2: Change in FEV<sub>1</sub>% and Association with Airway Mast Cell Number**

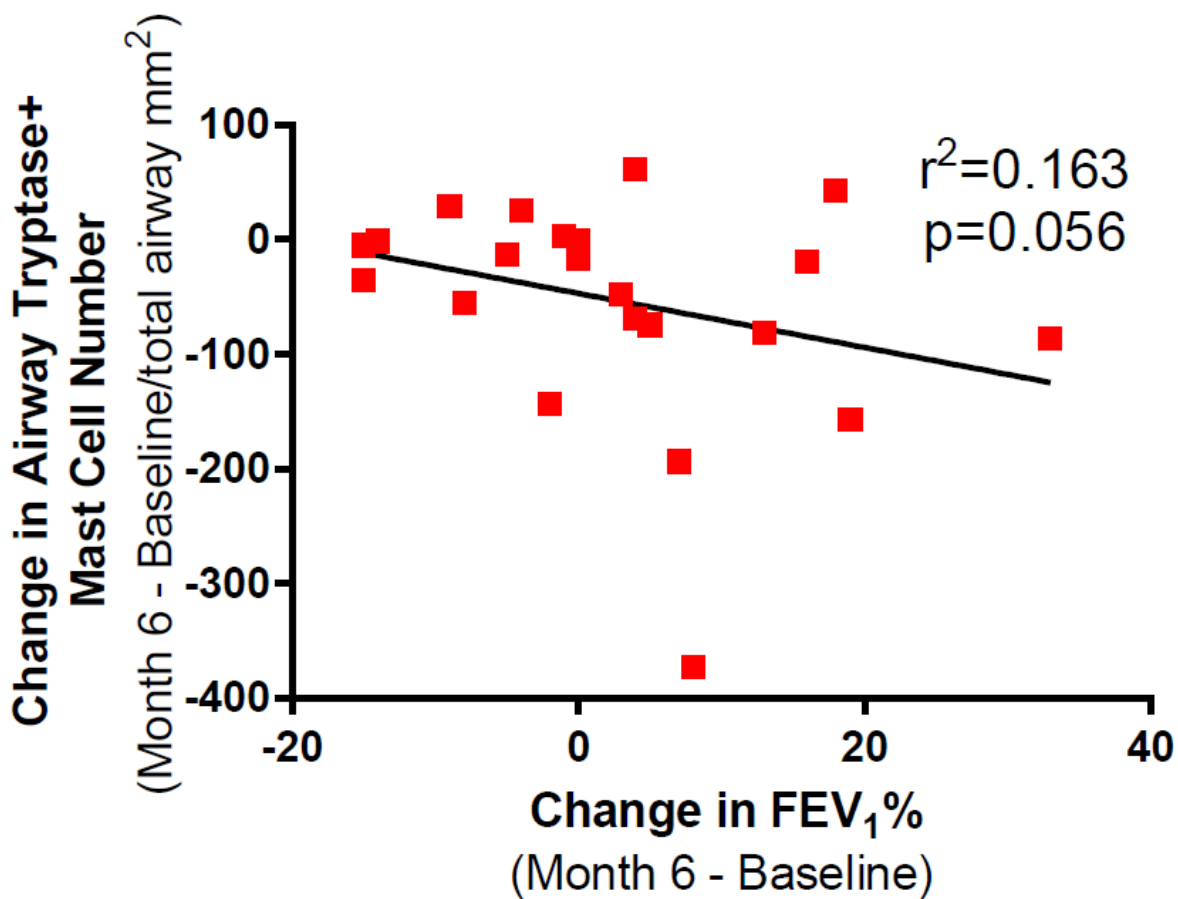

**Supplemental Figure S2: Change in FEV<sub>1</sub>% and Association with Airway Mast Cell Number**

Shown is the Spearman rank correlation between the change in FEV<sub>1</sub>% of predicted before the study to the end of the study and the change in total airway mast cell number as enumerated in endobronchial biopsies before treatment and at the end of treatment.

Supplemental Tables:

Supplemental Table S1. Detailed Study Procedure Schema

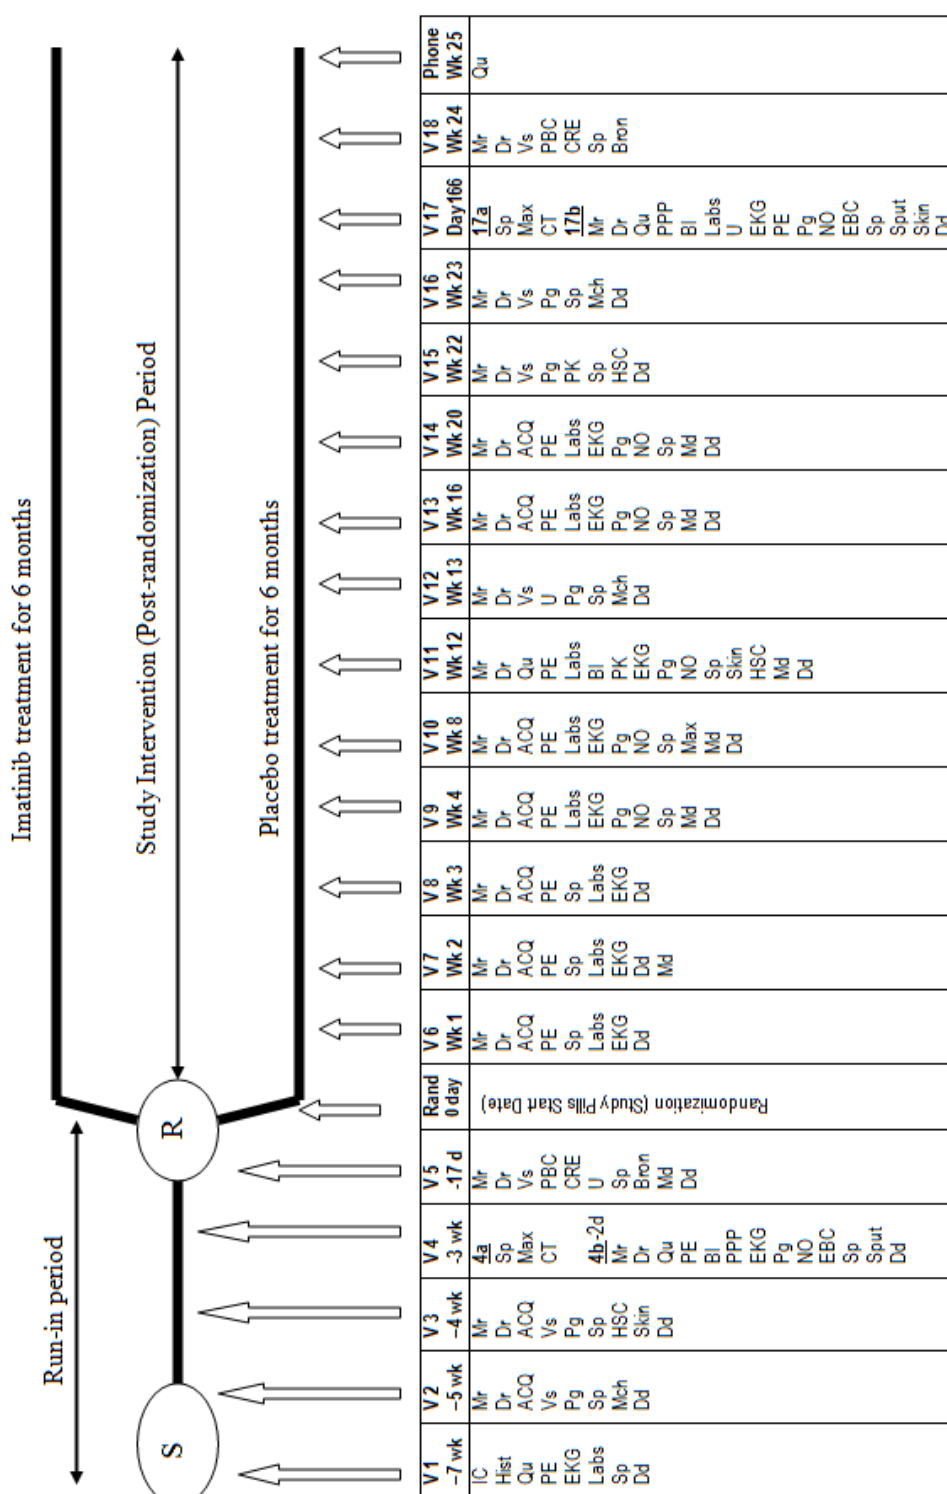

**Abbreviations used:** Bl- Blood for (IL-9R-alpha+CD34/c-Ki(CD13)- peripheral blood cells including mast cells, IgE; Future Genotyping, Blood for GWAS; Bron- bronchoscopy procedure; CRE - Cardio-respiratory exam; CT- CT scan chest; Dd- diary dispensation; Dr- Diary review; EBC- exhaled breath condensate; Hist- history; HSC- hypertonic saline challenge; IC- informed consent; Lab- Safety Labs (WBC with differential, Hematocrit, Platelet count, CMP, including eGFR, LFTs); Max- maximum bronchodilator reversibility; Mch- methacholine challenge test; Md- medication dispensation; Mr- Medication review; NO-eNO measurement; PBC- Pre-Bronch Checklist; PE- physical exam; Pg- pregnancy test; PK- pk monitoring; PPP - PT, PTT and Platelets count, Questionnaires (ACQ, AQLQ, ASUI, SFDO); R- Randomization; S- Screening; Skin- allergy skin test; Sp- spirometry; Sput- sputum induction and processing; U- Urine collection (PGD2 metabolite, 9c-11β-PGF2) ; Vs- Vital signs

**Visits Window Period:** V-2, 3, 4a, 6, 7, 8, 9, 13, 15, 16 and 17a can be scheduled within ± 3 days of window period. V-10, 11, 13 and 14 can be scheduled within a window period of 5 days. Randomization will be performed 7-14 days after the bronchoscopy procedure (V-5). Bronchoscopy should be performed within 4 days of the V-4 Bl, NO, EBC and Sput. Deviations will require protocol exceptions.

Supplemental Table S2. Adverse Events.

|                                                | <b>Placebo<br/>n (% of<br/>participants)<br/>#</b> | <b>Imatinib<br/>n (% of<br/>participants)<br/>#</b> | <b>P-value</b> |
|------------------------------------------------|----------------------------------------------------|-----------------------------------------------------|----------------|
| <b>Total Adverse Events Reported*</b>          | 118(80)                                            | 123(94)                                             | 0.86           |
| <b>Severe Adverse Events*</b>                  | 5(16.7)                                            | 3(9.4)                                              | 0.53           |
| <b>Serious Adverse Events</b>                  | 6(18.8)                                            | 2(6.7)                                              | 0.16           |
| <b>Allergy/Immunology</b>                      | 6(20)                                              | 3(9)                                                | 0.18           |
| <b>Auditory/Ear</b>                            | 0(0)                                               | 1(3)                                                | 1              |
| <b>Blood/Bone Marrow</b>                       | 2(7)                                               | 5(16)                                               | 0.43           |
| <b>Leukopenia</b>                              | 0(0)                                               | 2(6)                                                | 0.49           |
| <b>Anemia</b>                                  | 0(0)                                               | 1(3)                                                | 1              |
| <b>Cardiac</b>                                 | 1(3)                                               | 0(0)                                                | 1              |
| <b>Constitutional</b>                          | 3(10)                                              | 1(3)                                                | 0.35           |
| <b>Dermatologic</b>                            | 7(23)                                              | 10(22)                                              | 0.55           |
| <b>Gastrointestinal *</b>                      | 9(20)                                              | 17(31)                                              | 0.17           |
| <b>Nausea</b>                                  | 2(7)                                               | 6(19)                                               | 0.26           |
| <b>Diarrhea</b>                                | 3(10)                                              | 6(19)                                               | 0.48           |
| <b>Hemorrhage/Bleeding</b>                     | 1(3)                                               | 0(0)                                                | 0.48           |
| <b>Infection *</b>                             | 30(53)                                             | 21(60)                                              | 0.14           |
| <b>Lymphatics</b>                              | 1(3)                                               | 1(3)                                                | 1              |
| <b>Metabolic/Laboratory*</b>                   | 2(7)                                               | 14(34)                                              | 0.013          |
| <b>Hypophosphatemia</b>                        | 0(0)                                               | 6(19)                                               | 0.02           |
| <b>Hypokalemia</b>                             | 0(0)                                               | 3(9)                                                | 0.24           |
| <b>Elevated Aspartate<br/>Aminotransferase</b> | 0(0)                                               | 3(9)                                                | 0.24           |
| <b>Musculoskeletal/Soft Tissue *</b>           | 8(23)                                              | 15(31)                                              | 0.20           |
| <b>Muscle cramps (leg, foot) *</b>             | 2(7)                                               | 10(19)                                              | 0.046          |
| <b>Neurologic/Psychiatric*</b>                 | 5(10)                                              | 4(9)                                                | 0.67           |
| <b>Pain*</b>                                   | 13(30)                                             | 3(9)                                                | 0.017          |
| <b>Respiratory *</b>                           | 25                                                 | 24                                                  | 0.71           |
| <b>Asthma Exacerbations*</b>                   | 20(47)                                             | 16(41)                                              | 0.36           |
| <b>Renal/GU</b>                                | 0(0)                                               | 1(3)                                                | 1              |
| <b>Surgery</b>                                 | 3(10)                                              | 2(6)                                                | 0.67           |

\*Poisson regression model was used. #Number and percent of participants in each group who reported each type of adverse event. All events that occurred after randomization were included. n denotes number of participants reporting each type of adverse event.

**Supplemental Table S3: Severe Adverse Events**

| <b>GROUP</b>    | <b>PARTICIPANT</b> | <b>ADVERSE EVENT</b>                    | <b>Related to Drug</b> | <b>Related to Protocol</b> | <b>Serious</b> |
|-----------------|--------------------|-----------------------------------------|------------------------|----------------------------|----------------|
| <b>Imatinib</b> | 1                  | Asthma Exacerbation                     | Possible               | Not related                | Yes            |
|                 | 1                  | Asthma Exacerbation                     | Not related            | Probable                   | Yes            |
|                 | 1                  | Anaphylactic Reaction                   | Not related            | Not related                | Yes            |
|                 | 2                  | Nausea post-bronchoscopy                | Definite               | Possible                   | Yes            |
|                 | 2                  | Leukocytosis post-bronchoscopy          | Definite               | Possible                   | Yes            |
|                 | 3                  | Bilateral Leg Cramps                    | Probable               | Probable                   | No             |
|                 | 3                  | Hypokalemia                             | Probable               | Probable                   | No             |
| <b>Placebo</b>  | 1                  | Asthma Exacerbation                     | Not related            | Not related                | Yes            |
|                 | 1                  | Asthma Exacerbation                     | Not related            | Not related                | Yes            |
|                 | 2                  | Asthma Exacerbation                     | Possible               | Not related                | Yes            |
|                 | 2                  | Asthma Exacerbation                     | Possible               | Not related                | Yes            |
|                 | 2                  | Acute Upper Respiratory Tract Infection | Possible               | Not related                | Yes            |
|                 | 3                  | Asthma Exacerbation                     | Not related            | Not related                | Yes            |
|                 | 3                  | Asthma Exacerbation                     | Not related            | Not related                | Yes            |
|                 | 4                  | Ankle Dislocation                       | Not related            | Not related                | Yes            |
|                 | 5                  | Angioedema                              | Not related            | Not related                | No             |

**Supplemental Table S4: Baseline values for outcome measures**

| <b>Baseline Parameter – mean ± SD</b>                       | <b>Imatinib</b> | <b>Placebo</b> |
|-------------------------------------------------------------|-----------------|----------------|
| <b>Serum Tryptase (ng/mL)</b>                               | 4.96±2.25       | 4.70±2.04      |
| <b>BAL Fluid Tryptase (ng/mL)</b>                           | 1.34±2.19       | 0.96±0.91      |
| <b>Total Airway Tryptase+ MCs (/mm<sup>2</sup>)</b>         | 129.6±91.7      | 146.2±85.9     |
| <b>Airway Smooth Muscle Tryptase+ MCs (/mm<sup>2</sup>)</b> | 174.4±174.6     | 208.2±190.0    |
| <b>BAL PGD<sub>2</sub> (pg/mL)</b>                          | 33.0±51.4       | 37.7±51.0      |
| <b>BAL cysLTs (pg/mL)</b>                                   | 55.3±34.3       | 56.8±22.2      |
| <b>BAL Histamine (nM)</b>                                   | 0.92±1.01       | 2.70±12.22     |
| <b>BAL Tryptase (ng/mL)</b>                                 | 1.64±2.70       | 0.91±0.90      |
| <b>Urinary PGD-M (ng/mg Cr)*</b>                            | 2.82±1.7        | 1.87±0.99      |
| <b>Urinary LTE<sub>4</sub> (ng/mg Cr)</b>                   | 0.15±0.23       | 0.11±0.16      |
| <b>BAL Eosinophil %</b>                                     | 0.95±1.43       | 3.0±10.98      |
| <b>Airway Wall Thickness (%)</b>                            | 0.306±0.042     | 0.325±0.038    |
| <b>Airway Wall Area (%)</b>                                 | 0.62±0.04       | 0.64±0.03      |

SD denotes standard deviation, MC mast cell, BAL bronchoalveolar lavage, PGD<sub>2</sub> prostaglandin D<sub>2</sub>, cysLTs cysteinyl leukotrienes, PGD-M prostaglandin D<sub>2</sub> metabolite, and LTE<sub>4</sub> leukotriene E<sub>4</sub>. \* p=0.04.



**References:**

1. Martin RJ, Szeffler SJ, King TS, Kraft M, Boushey HA, Chinchilli VM, et al. The Predicting Response to Inhaled Corticosteroid Efficacy (PRICE) trial. *The Journal of allergy and clinical immunology*. 2007;119(1):73-80.
2. Martin RJ, Wanger JS, Irvin CG, Bucher Bartelson B, Cherniack RM. Methacholine challenge testing: safety of low starting FEV1. Asthma Clinical Research Network (ACRN). *Chest*. 1997;112(1):53-6.
3. Crapo RO, Casaburi R, Coates AL, Enright PL, Hankinson JL, Irvin CG, et al. Guidelines for methacholine and exercise challenge testing-1999. This official statement of the American Thoracic Society was adopted by the ATS Board of Directors, July 1999. *Am J Respir Crit Care Med*. 2000;161(1):309-29.
4. Richter K, Kannies F, Mark B, Jorres RA, Magnussen H. Assessment of accuracy and applicability of a new electronic peak flow meter and asthma monitor. *Eur Respir J*. 1998;12(2):457-62.
5. Morrow JD, Minton TA. Improved assay for the quantification of 11-dehydrothromboxane B2 by gas chromatography-mass spectrometry. *J Chromatogr*. 1993;612(2):179-85.
6. Morrow JD, Guzzo C, Lazarus G, Oates JA, Roberts LJ, 2nd. Improved diagnosis of mastocytosis by measurement of the major urinary metabolite of prostaglandin D2. *J Invest Dermatol*. 1995;104(6):937-40.
7. Schwartz LB, Bradford TR, Rouse C, Irani AM, Rasp G, Van der Zwan JK, et al. Development of a new, more sensitive immunoassay for human tryptase: use in systemic anaphylaxis. *J Clin Immunol*. 1994;14(3):190-204.
8. Schwartz LB. Tryptase, a mediator of human mast cells. *The Journal of allergy and clinical immunology*. 1990;86(4 Pt 2):594-8.
9. Kim DC, Hsu FI, Barrett NA, Friend DS, Grenningloh R, Ho IC, et al. Cysteinyl leukotrienes regulate Th2 cell-dependent pulmonary inflammation. *J Immunol*. 2006;176(7):4440-8.
10. Siddiqui S, Mistry V, Doe C, Roach K, Morgan A, Wardlaw A, et al. Airway hyperresponsiveness is dissociated from airway wall structural remodeling. *The Journal of allergy and clinical immunology*. 2008;122(2):335-41, 41 e1-3.
11. Pesci A, Foresi A, Bertorelli G, Chetta A, Olivieri D. Histochemical characteristics and degranulation of mast cells in epithelium and lamina propria of bronchial biopsies from asthmatic and normal subjects. *Am Rev Respir Dis*. 1993;147(3):684-9.
